# Supplementary figures and images for: Methyl-SNP-seq reveals dual readouts of methylome and variome at molecule resolution while enabling target enrichment
Source: HighWire-hosted journal article supplement (doi:10.1101/gr.277080.122), 2022-11-01

B

*E. coli*

Distance

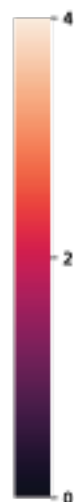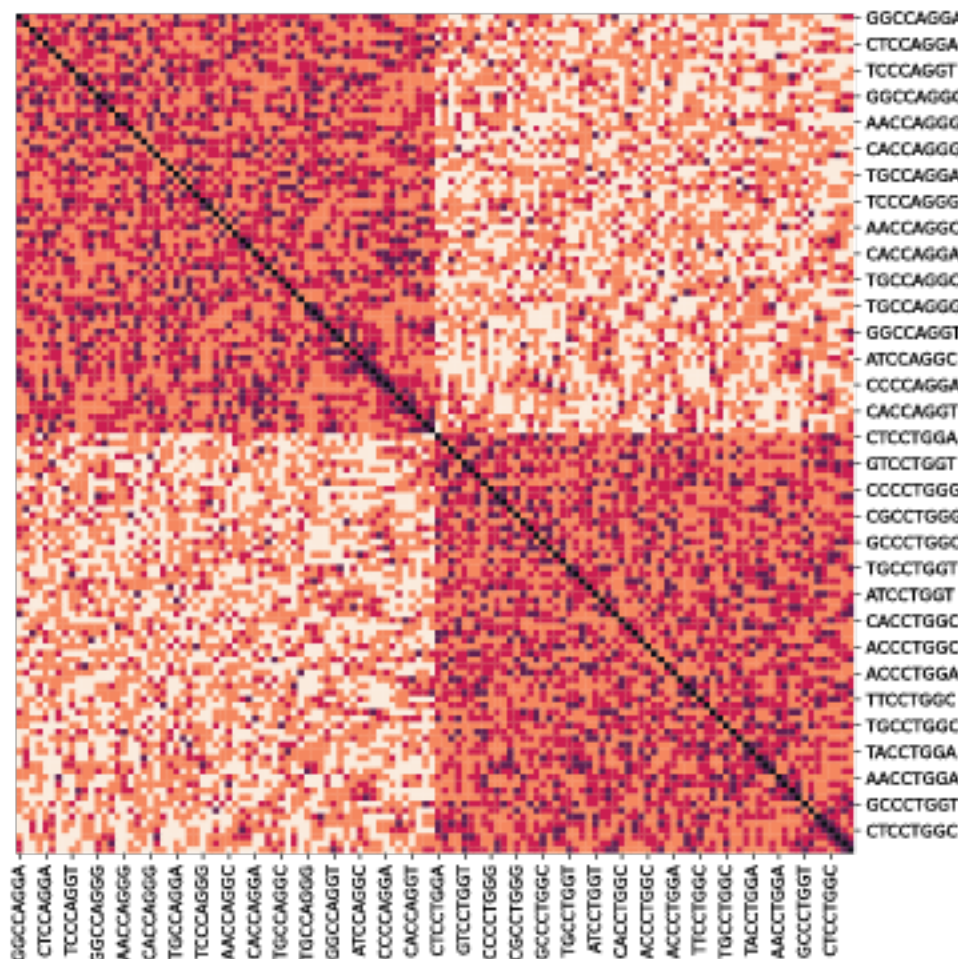

64

64

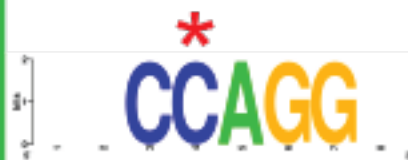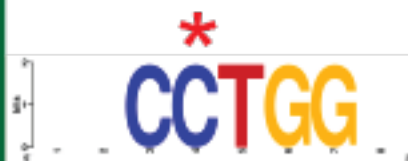

Supplement: SupplementaryCode.tar.gz [file Ecoli_motif_logo.pdf › TestData/Ecoli_motif_logo.pdf]
